# Supplementary material
Source: PubMed Central journal article supplement (PMC4289689)
Supplement: mmc1.pdf [file mmc1.pdf]

The American Journal of Human Genetics

Supplemental Data

## **Defects of *CRB2* Cause**

## **Steroid-Resistant Nephrotic Syndrome**

Lwaki Ebarasi, Shazia Ashraf, Agnieszka Bierzynska, Heon Yung Gee, Hugh J. McCarthy, Svjetlana Lovric, Carolin E. Sadowski, Werner Pabst, Virginia Vega-Warner, Humphrey Fang, Ania Koziell, Michael A. Simpson, Ismail Dursun, Ervin Serdaroglu, Shawn Levy, Moin A. Saleem, Friedhelm Hildebrandt, and Arindam Majumdar

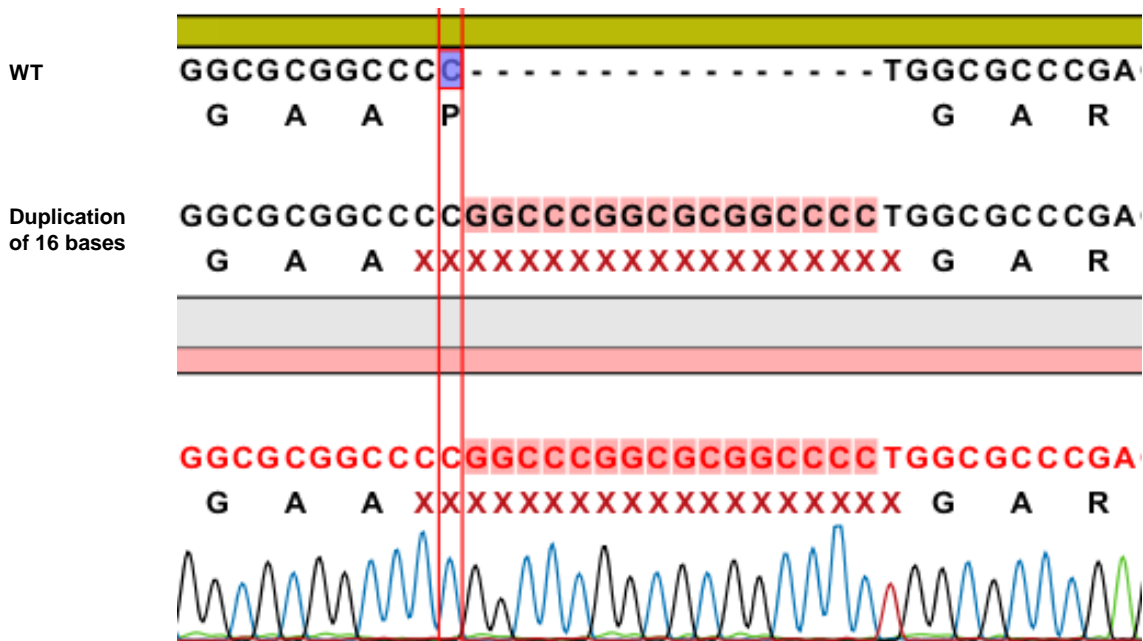

**Figure S1.** Amplification and cloning using the genomic DNA of the affected individual from family S1232 showed duplication of sixteen bases in exon 10 of CRB2.

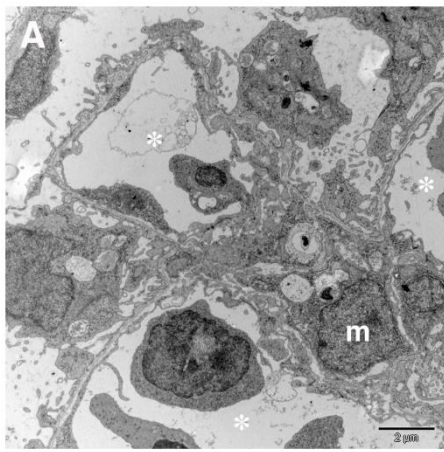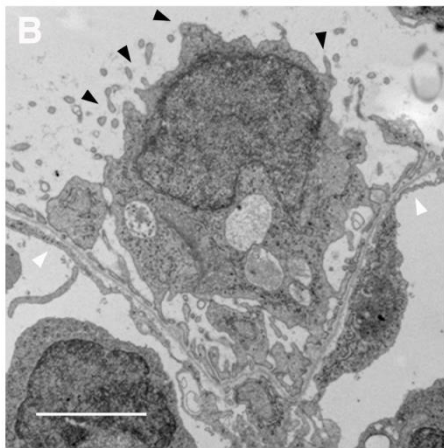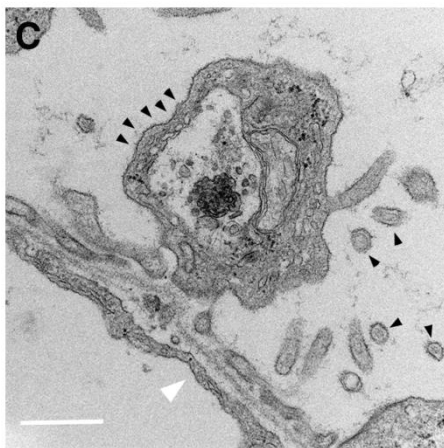

**Figure S2. Electron microscopic analysis of *crb2b*<sup>-/-</sup> glomeruli and podocytes.**

- (A)** Capillary loops in *crb2b*<sup>-/-</sup> glomeruli are disorganized. Capillary endothelia lack fenestrations (capillary lumens are marked with asterisks). Mesangial cells (m) can be identified closely associated with endothelia and surrounded by GBM. Scale bar, 2 μm.
- (B)** Representative *crb2b*<sup>-/-</sup> podocyte shows apical membrane projections (black arrowheads) and disorganized foot process structure. Note the absence of endothelial fenestrations (white arrowhead). Scale bar, 2 μm.
- (C)** Detail of *crb2b*<sup>-/-</sup> podocyte process. The disorganized process contains vesicular structures (black arrowheads) and apical membrane extensions. The GBM is visible and endothelial membranes lack fenestrations (white arrowhead). Scale bar, 500 nm.

**Table S1. Filtering process for variants from normal reference sequence (VRS) following WES in one sibling from family A1968 affected with SRNS.**

| FAMILY                                                                     | A1968                  |
|----------------------------------------------------------------------------|------------------------|
| <sup>a</sup> AFFECTED SIBLING SENT FOR WES                                 | A1968-21               |
| Consanguinity                                                              | Yes                    |
| <sup>b</sup> # of homozygosity peaks                                       | 5                      |
| Cumulative Homozygosity by descent <sup>c</sup> [Mb]                       | 106                    |
| <sup>c</sup> Hypothesis from mapping: homozygous (Hom), heterozygous (het) | Hom                    |
| Total sequence reads (Mill.)                                               | 212                    |
| Matched Reads                                                              | 98.2%                  |
| Total DIPs                                                                 | 79,344                 |
| Exonic DIPs                                                                | 325                    |
| % exonic / total DIPs                                                      | 0.40%                  |
| DIPS not SNP137                                                            | 152                    |
| DIPS in linked region                                                      | 24                     |
| DIPS after after inspection and not SNP138 (>1% MAF)                       | 0                      |
| Sanger confirmation / Segregation                                          | -                      |
| Total SNPs                                                                 | 319,298                |
| Exonic SNPs                                                                | 5,529                  |
| % exonic / total SNPs                                                      | 1.70%                  |
| SNPs not SNP137                                                            | 466                    |
| SNPs in linked region                                                      | 132                    |
| SNPs after after inspection and not SNP138 (>1% MAF)                       | 15                     |
| <sup>d</sup> Sanger confirmation / Segregation                             | 1                      |
| Causative gene                                                             | <b>CRB2</b>            |
| Mutation effect on gene product                                            | <b>Cys620Ser (Hom)</b> |

<sup>a</sup>see Table 1

<sup>b</sup>see Fig. 1

<sup>c</sup>evaluation for homozygous variants was done in regions of homozygosity by descent for 2 affected sibs.

<sup>d</sup>red numbers denote number of filtered-down variant(s) that contained the disease causing gene.

"-" , not applicable; DIP, deletion/insertion polymorphism; SNPs, single nucleotide polymorphism; SRNS, Steroid Resistant Nephrotic Syndrome.
