# Supplementary material
Source: PubMed Central journal article supplement (PMC4289689)
Supplement: mmc2.pdf [file mmc2.pdf]

## Defects of *CRB2* Cause Steroid-Resistant Nephrotic Syndrome

Lwaki Ebarasi,<sup>1,2,12</sup> Shazia Ashraf,<sup>3,12</sup> Agnieszka Bierzynska,<sup>4</sup> Heon Yung Gee,<sup>3</sup> Hugh J. McCarthy,<sup>4</sup> Svtjetlana Lovric,<sup>3</sup> Carolin E. Sadowski,<sup>3</sup> Werner Pabst,<sup>3</sup> Virginia Vega-Warner,<sup>5</sup> Humphrey Fang,<sup>3</sup> Ania Koziell,<sup>6</sup> Michael A. Simpson,<sup>7</sup> Ismail Dursun,<sup>8</sup> Erkin Serdaroglu,<sup>9</sup> Shawn Levy,<sup>10</sup> Moin A. Saleem,<sup>4</sup> Friedhelm Hildebrandt,<sup>3,11,\*</sup> and Arindam Majumdar<sup>1,\*</sup>

Nephrotic syndrome (NS), the association of gross proteinuria, hypoalbuminaemia, edema, and hyperlipidemia, can be clinically divided into steroid-sensitive (SSNS) and steroid-resistant (SRNS) forms. SRNS regularly progresses to end-stage renal failure. By homozygosity mapping and whole exome sequencing, we here identify recessive mutations in *Crumbs homolog 2 (CRB2)* in four different families affected by SRNS. Previously, we established a requirement for zebrafish *crb2b*, a conserved regulator of epithelial polarity, in podocyte morphogenesis. By characterization of a loss-of-function mutation in zebrafish *crb2b*, we now show that zebrafish *crb2b* is required for podocyte foot process arborization, slit diaphragm formation, and proper nephrin trafficking. Furthermore, by complementation experiments in zebrafish, we demonstrate that *CRB2* mutations result in loss of function and therefore constitute causative mutations leading to NS in humans. These results implicate defects in podocyte apico-basal polarity in the pathogenesis of NS.

Podocytes are highly specialized and polarized epithelial cells that are critical for renal glomerular filtration via their interdigitated foot processes connected by the slit diaphragm.<sup>1</sup> Accordingly, disruption of foot process organization inevitably results in nephrotic syndrome (NS).<sup>2</sup> Steroid-resistant NS (SRNS) leads to end-stage renal disease.<sup>3–5</sup> We have recently shown in a cohort of families affected by SRNS that 33% of all cases are caused by mutation in 1 of 21 different genes described in Mendelian forms of SRNS.<sup>6</sup> However, a large percentage of cases remain molecularly unsolved. To identify additional genes mutated in SRNS in humans, we obtained blood samples and pedigrees after acquiring informed consent from individuals with SRNS and their family members. Approval for human subject research was obtained from the institutional review boards at the University of Michigan and the Boston Children's Hospital. We performed homozygosity mapping (HM)<sup>7</sup> followed by whole exome sequencing (WES) in these families affected by SRNS. In a family (A1968) of Turkish origin, two siblings had SRNS with renal histology of focal segmental glomerulosclerosis (FSGS) (Table 1). HM in both affected siblings yielded five regions of homozygosity by descent with a cumulative genomic length of ~106 Mb. None of the homozygous peaks coincided with any of seven common recessive causes of SRNS (Figure 1A), suggesting that genes known to be mutated in SRNS were not likely to be involved. By WES in one of the affected siblings from family

A1968, we detected a homozygous missense mutation: c.1859G>C (p.Cys620Ser) in exon 7 of *CRB2* (*crumbs* family member 2; RefSeq accession number NM\_173689 [MIM 609720]) on chromosome 9 (Figures 1B–1F). This variant was the only homozygous variant remaining from the variant filtering process (Table S1 available online). The mutation alters an evolutionarily conserved cysteine residue within the tenth EGF-like repeat (Figures 1C–1F). It segregated with the affected status in this family and was absent from >190 ethnically matched healthy control individuals and from >6,500 European controls in the Exome Variant Server (Table 1).

By WES in another family (S1232) with an individual affected with SRNS, we identified compound heterozygous mutations: c.1882C>T (p.Arg628Cys) and c.3089\_3104dup (p.Gly1036Alafs\*43) in *CRB2* (Figure 1F, Table 1). The heterozygous mutation c.1882C>T (p.Arg628Cys) altered an amino acid residue that was conserved from *C. intestinalis* to humans and was inherited from the mother (Figure 1G, Table 1). The other heterozygous mutation in this individual was a deleterious duplication of 16 bases c.3089\_3104dup (p.Gly1036Alafs\*43) in exon 10 of *CRB2* (Figure 1F). This variant occurred de novo in the affected individual (Table 1). The duplication was confirmed by PCR amplification, cloning, and sequencing of the genomic DNA from the affected individual (Figure S1).

To discover additional mutations in *CRB2*, we then performed array-based multiplex barcoded PCR amplification

<sup>1</sup>Department of Immunology, Genetics, and Pathology, Uppsala University, 751 85 Uppsala, Sweden; <sup>2</sup>Department of Medical Biochemistry and Biophysics, Karolinska Institute, 171 77 Stockholm, Sweden; <sup>3</sup>Division of Nephrology, Boston Children's Hospital, Harvard Medical School, Boston, MA 02115, USA; <sup>4</sup>Children's and Academic Renal Unit, University of Bristol, Bristol BS1 5NB, UK; <sup>5</sup>Department of Pediatrics, University of Michigan, Ann Arbor, MI 48109, USA; <sup>6</sup>Department of Experimental Immunobiology, Medical and Molecular Genetics, King's College London, 8th Floor Tower Wing, Guy's Hospital, Great Maze Pond, London SE1 9RT, UK; <sup>7</sup>Medical and Molecular Genetics, King's College London, 8th Floor Tower Wing, Guy's Hospital, Great Maze Pond, London SE1 9RT, UK; <sup>8</sup>Departments of Pediatric Nephrology and Rheumatology, Erciyes University, Kayseri 38039, Turkey; <sup>9</sup>Department of Pediatric Nephrology, Dr. Behcet Uz Children Hospital, Izmir 35210, Turkey; <sup>10</sup>HudsonAlpha Institute for Biotechnology, 601 Genome Way, Huntsville, AL 35806, USA; <sup>11</sup>Howard Hughes Medical Institute, Chevy Chase, MD 20815, USA

<sup>12</sup>These authors contributed equally to this work

\*Correspondence: [friedhelm.hildebrandt@childrens.harvard.edu](mailto:friedhelm.hildebrandt@childrens.harvard.edu) (F.H.), [arindam.majumdar@igp.uu.se](mailto:arindam.majumdar@igp.uu.se) (A.M.)

<http://dx.doi.org/10.1016/j.ajhg.2014.11.014>. ©2015 by The American Society of Human Genetics. All rights reserved.

| Table 1. Recessive <i>CRB2</i> Mutations Detected in Four Families Affected by SRNS |                |                        |                                       |                                  |                                        |                                               |                  |                  |                |                                |
|-------------------------------------------------------------------------------------|----------------|------------------------|---------------------------------------|----------------------------------|----------------------------------------|-----------------------------------------------|------------------|------------------|----------------|--------------------------------|
| Family and Individual                                                               | Ethnic Origin  | Parental Consanguinity | Nucleotide Alteration(s) <sup>a</sup> | Alteration(s) in Coding Sequence | Exon (Segregation)                     | Amino Acid Sequence Conservation <sup>b</sup> | PolyPhen-2 Score | Age at Onset     | Kidney Disease | Histology (at Age)             |
| A1968-21, A1968-22                                                                  | Turkey         | yes                    | c.1859G>C                             | p.Cys620Ser                      | 7 (HOM, M, P)                          | <i>C. elegans</i>                             | 0.989            | 6 years, 4 years | SRNS, SRNS     | FSGS (6 years), FSGS (4 years) |
| S1232                                                                               | Europe         | no                     | c.1882C>T (c.3089_3104dup)            | p.Arg628Cys (p.Gly1036Alafs*43)  | 7 (het, M), 10 (het, de novo in child) | <i>C. intestinalis</i> , NA                   | 0.549, NA        | 9 mo             | SRNS           | ND                             |
| A3893-21                                                                            | Turkey         | yes                    | c.1886G>C                             | p.Cys629Ser                      | 7 (HOM, M, P)                          | <i>C. elegans</i>                             | 0.997            | 3 years          | SRNS           | FSGS (3 years)                 |
| A2222-21                                                                            | Western Europe | yes                    | c.3746G>A                             | p.Arg1249Gln                     | 13 (HOM, M, P)                         | <i>C. elegans</i>                             | 0.998            | ND               | SRNS           | FSGS (ND)                      |

Abbreviations are as follows: FSGS, focal segmental glomerulosclerosis; het, heterozygous in affected individual; HOM, homozygous in affected individual; M, heterozygous mutation identified in mother; NA, not applicable; ND, no data or DNA available; P, heterozygous mutation identified in father; SRNS, steroid-resistant nephrotic syndrome.

<sup>a</sup>All mutations were absent from >190 ethnically matched healthy control individuals and from >6,500 European control individuals in the EVS server.

<sup>b</sup>*CRB2* has been evolutionarily conserved through evolution to *C. intestinalis* (sea squirt) (RefSeq XP\_002124076.1), *D. melanogaster* (RefSeq AAA28428.1), and *C. elegans* (RefSeq NP\_510822.1).

and next-generation sequencing<sup>8</sup> in an additional 1,010 families with SRNS. In an individual from Turkey with SRNS (A3893-21), we detected a homozygous missense mutation (c.1886G>C [p.Cys629Ser]) in exon 7 of *CRB2* (Figure 1F, Table 1). In another individual from an unrelated family (A2222-21), we identified a third homozygous missense mutation: c.3746G>A (p.Arg1249Gln) in *CRB2* (Figure 1F, Table 1). The missense mutation c.1886G>C (p.Cys629Ser) also alters a conserved cysteine within the tenth EGF-like repeat, whereas c.3746G>A (p.Arg1249Gln) changes a conserved arginine in the cytoplasmic tail of *CRB2* (Figure 1F). Renal biopsy revealed FSGS in four of the five individuals (Table 1).

*CRB2* spans 22.49 kb on chromosome 9q33.4 (Figure 1C). The longest transcript of *CRB2* (RefSeq NM\_173689 [MIM 609720]) has 13 coding exons (Figure 1D). As a result of alternative splicing, *CRB2* encodes two isoforms: isoform 1, a putative type I transmembrane protein of 1,285 amino acids (Figure 1E), and isoform 2, a secreted protein of 1,176 amino acids.<sup>9</sup> *CRB2* is known to contain 15 extracellular EGF-like domains and 3 extracellular laminin G-like domains (Figure 1E). Interestingly, three of the identified missense mutations (p.Cys620Ser, p.Arg628Cys, and p.Cys629Ser) occur within exon 7 of *CRB2*, which encodes the extracellular tenth EGF-like domain of this protein. This suggests that the tenth EGF-like domain might play an important role in *CRB2* function in podocytes. Interestingly, many other disease-associated missense mutations affect amino acids in the well-conserved EGF-like repeats and laminin A domains of the paralog *CRB1*, implying an important function for the extracellular region of *CRB1* in human retinal dystrophies.<sup>10,11</sup>

We performed immunofluorescence staining in rat kidneys and demonstrated that *CRB2* is expressed in podocytes in adult rat glomeruli (Figure 2). *CRB2*-positive staining was seen in cells positive for the podocyte markers WT1, GLEPP1, SYNAPTOPODIN, and PODOCALYXIN (Figure 2). *CRB2* colocalizes most tightly with GLEPP1 among podocytic markers used in the immunofluorescence, consistent with the localization of *CRB2* at the slit diaphragms of podocytes (Figure 2C).

In an earlier study, we reported that morpholino-induced knockdown of zebrafish *crb2b* resulted in podocyte foot process defects with ensuing proteinuria.<sup>12</sup> To genetically define *crb2b* function in podocyte differentiation, we now obtained a stable heritable loss-of-function mutation in *crb2b*. The *crb2b* mutant allele was caused by a retroviral murine leukemia virus (MLV) insertion in the *crb2b* locus and is transmitted to offspring as a recessive mutation in Mendelian ratios (see Supplemental Methods).<sup>13,14</sup> *crb2b*<sup>-/-</sup> homozygous embryos are indistinguishable from *crb2b*<sup>+/-</sup> sibs up to 4 days postfertilization (dpf), after which they show pronephric cysts and pericardial edema, both indicators of kidney dysfunction (Figures 3A and 3B). By 5 dpf, *crb2b*<sup>-/-</sup> embryos have smaller eyes, consistent with requirement in photoreceptor differentiation.<sup>15,16</sup> The pronephric and eye phenotypes are due to

specific loss of *crb2b* gene function, as shown by the fact that both can be rescued by injection of full-length zebrafish *Crb2b* mRNA (Figure 3C).

Histological sectioning showed glomerular morphogenesis defects in *crb2b*<sup>-/-</sup> homozygotes (Figure 3D). We next performed electron microscopic analysis of *crb2b*<sup>-/-</sup> mutant pronephric glomeruli to assess podocyte structure. Ultrastructurally, the *crb2b*<sup>-/-</sup> homozygotes show disruption of the regular array of patterned podocyte foot processes, which represents the disappearance of slit diaphragms (Figures 3E–3G). Interestingly, *crb2b*<sup>-/-</sup> foot processes contain vesicular-like structures not observed in control *crb2b*<sup>+/-</sup> sibs. In addition, the apical membranes of *crb2b*<sup>-/-</sup> podocytes show membrane projections that reach into Bowman's space (Figures 3E, 3F, and S2). In *crb2b*<sup>-/-</sup> glomeruli, the glomerular basement membrane (GBM) is present but capillary endothelia lack membrane fenestrations (Figure 3F). In control phenotypically wild-type 5 dpf *crb2b*<sup>wt</sup> embryos, we counted 2.67 ± 0.71 fenestrations/μm (n = 5 capillary loops from 3 glomeruli). However, in 5 dpf *crb2b*<sup>-/-</sup> embryos, we found no glomerular capillary endothelial fenestrations at all (Figure 3G). In order to determine whether glomerular filtration function was affected in *crb2b*<sup>-/-</sup> mutants, we performed a dye filtration assay in living 4.5 dpf larvae. Both 500 kDa FITC-labeled and 10 kDa rhodamine-labeled dextrans colocalized within the pronephric proximal tubules, indicating compromised size selectivity in the glomerular filtration barrier (Figure 3H). We conclude that *crb2b* is genetically required for correct foot process arborization and podocyte morphological differentiation.

Because Crb proteins are required for epithelial apical basal differentiation, we examined whether cell polarity might be affected in *crb2b*<sup>-/-</sup> podocytes. Phalloidin labels the F-actin network of podocyte foot processes. In phenotypically wild-type *crb2b*<sup>wt</sup> 4.5 dpf larvae, phalloidin labeled the basal F-actin rich podocyte processes that cover the outer aspect of glomerular capillaries. We found that in *crb2b*<sup>-/-</sup>, phalloidin is basally concentrated and seen outlining large fused capillaries, indicating that capillary morphogenesis is affected (Figure 4A). Podocyte apical membranes are rich in podocalyxin.<sup>17</sup> In both *crb2b*<sup>wt</sup> sibs and *crb2b*<sup>-/-</sup> embryos, α-Pdxl2<sup>18</sup> staining is present in podocyte membranes, indicating the presence of apical membranes. However, in *crb2b*<sup>-/-</sup> podocytes, ectopic α-Pdxl2 membrane extensions are seen in the Bowman's space (insets, Figures 4B, 4C, and 4F), suggesting apical membrane defects. Nephtrin is a transmembrane protein component of the podocyte slit diaphragms and basally localized in *crb2b*<sup>wt</sup> podocytes.<sup>19–21</sup> In contrast, we found apical α-nephtrin<sup>12</sup> localization in *crb2b*<sup>-/-</sup> podocytes, indicating defects in nephtrin trafficking (insets, Figures 4D and 4G). ZO-1 is a tight junction protein and also found in podocyte slit diaphragms.<sup>22,23</sup> In *crb2b*<sup>-/-</sup> podocytes, α-ZO-1 staining was found to be generally reduced (Figure 4E). These results indicate that apical membrane differentiation and protein trafficking of slit components are affected in *crb2b* mutants.

We employed the zebrafish *crb2b*<sup>-/-</sup> mutant to test the functional consequences of *CRB2* mutations identified in the human families. The human *CRB2* open reading frame (RefSeq NM\_173689 [MIM 609720]) was synthesized and cloned into pcDNA 3.1 by Genescript. Mutations were introduced into the human *CRB2* open reading frame by site-directed mutagenesis. In *crb2b*<sup>+/-</sup> ♂ × ♀ incrosses, *crb2b*<sup>-/-</sup> embryos were generated in Mendelian ratios (Figure 5). However, when an in vitro synthesized mRNA encoding the human wild-type *CRB2* was injected, only 9% of the resulting embryos were phenotypically *crb2b* mutant, demonstrating rescue and functional conservation of the human and zebrafish *CRB2* genes. Injection of mRNA harboring the human *CRB2* mutation c.1859G>C (p.Cys620Ser); *CRB2*<sup>C620S</sup> into *crb2b*<sup>+/-</sup>, ♂ × ♀ incrosses resulted in 19% *crb2b*<sup>-/-</sup>, suggesting that mutation c.1859G>C (p.Cys620Ser) disrupts *CRB2* ability to rescue and represents a loss-of-function mutation (Figure 5). The *CRB2* protein harboring p.Cys629Ser showed an intermediate level of rescue compared to wild-type *CRB2*, suggesting a milder loss of protein function compared to p.Cys620Ser.

In this report, we show that heritable mutations in the gene encoding human polarity complex protein *CRB2* cause monogenic SRNS in humans. In addition, by testing for phenotypic complementation in the zebrafish *crb2b*<sup>-/-</sup> mutant, we were able to demonstrate that these mutations resulted in loss of function and were probably pathogenic alterations in human *CRB2*. The discovery that *CRB2* mutations cause a recessive Mendelian form of SRNS suggests that the misregulation of podocyte apical basal polarity is an important causative factor in primary FSGS. Foot process arborization, cytoskeletal architecture, trafficking, and membrane biogenesis take part in the regulation of apical basal polarity. Our findings raise the possibility that genes encoding other polarity complex members could also be mutated in heritable and sporadic forms of NS.

## Supplemental Data

Supplemental Data include one table and two figures and can be found with this article online at <http://dx.doi.org/10.1016/j.ajhg.2014.11.014>.

## Acknowledgments

We would like to acknowledge the late Michelle Winn (Duke University) for initial attempts at finding human *CRB2* mutations. We thank Markus Affolter and Hans Georg Belting for the α-Pdxl2 antibody. Special thanks to Lars Holmgren (Karolinska Institute) and Lena Claesson-Welsh (Uppsala University) for their overall support and encouragement. We thank Leslie Steed for clinical samples, Gisbert Hauptmann and Iris Sol for zebrafish care, and Katarina Garpenstrand and Johan Ledin at the SciLife zebrafish, Uppsala University. The authors also thank the families who contributed to this study. This research was supported by grants from the NIH to F.H. (DK076683, DK086542) and by the NephCure Foundation to F.H. H.Y.G. is supported by the NephCure-ASN Foundation Kidney Research grant. F.H. is an

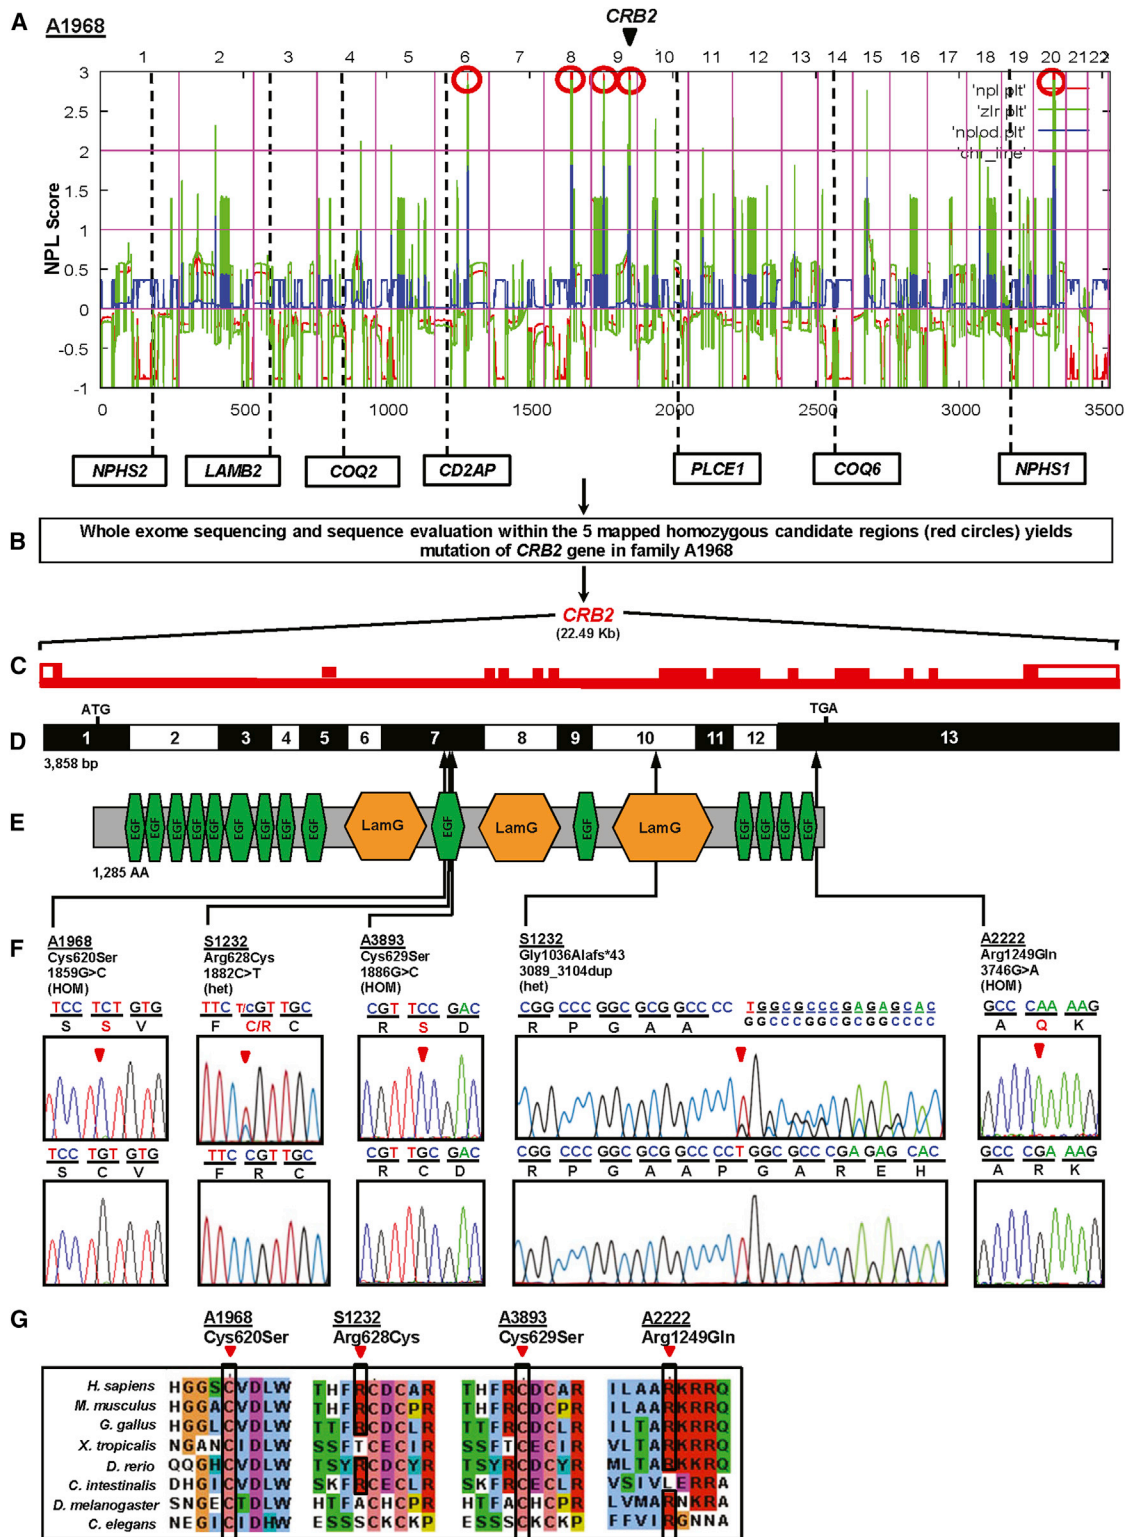

**Figure 1. Homozygosity Mapping and WES Identifies *CRB2* Mutations as Causing Steroid-Resistant Nephrotic Syndrome in Humans**  
 (A) Nonparametric LOD score (NPL) profile across the human genome in two sibs with SRNS of consanguineous family A1968. SNP mapping was performed with the Affymetrix 250 *StyI* array. SNP positions on human chromosomes are concatenated from p-ter (left) to q-ter (right) on the x axis. Genetic distance is given in cM. Five maximum NPL peaks (red circles) indicate candidate regions of homozygosity by descent. Note that none of the peaks overlap with any of the seven known recessive NS loci.  
 (B) WES of one of the affected sibs from family A1968 and sequence evaluation within the five mapped homozygous candidate regions (red circles in A) yields mutation of *CRB2* in A1968.  
 (C) The *CRB2* gene extends over 22.49 kb and contains 13 exons (vertical hatches).

(legend continued on next page)



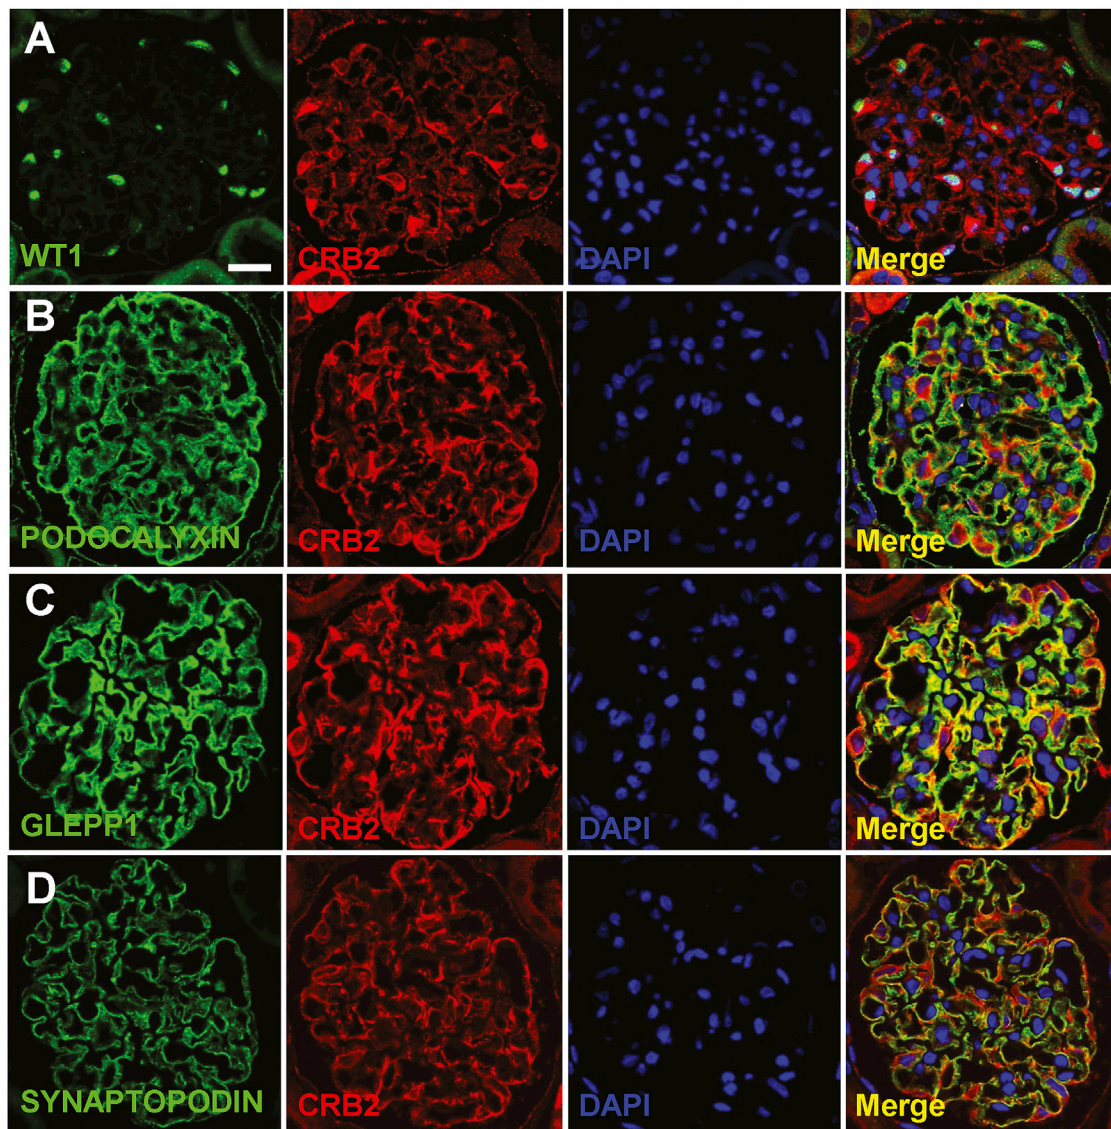

**Figure 2. Localization of CRB2 in Adult Rat Kidney**

(A) Coimmunofluorescence of CRB2 (Abgent) with WT1 (Santa Cruz Biotech). CRB2 localizes to podocytes, the nuclei of which are marked by WT1.

(B–D) Coimmunofluorescence of CRB2 with podocytic markers PODOCALYXIN (B), GLEPP1 (C), and SYNAPTOPODIN (D) (American Research Products). CRB2 colocalizes most tightly with GLEPP1 among podocytic markers used in immunofluorescence. Note that PODOCALYXIN and GLEPP1 mark the apical podocyte foot process domain, and GLEPP1 is next to the slit membrane adherens junctions. SYNAPTOPODIN marks podocyte processes distal of the slit membrane.

Scale bar represents 10  $\mu\text{m}$ . PODOCALYXIN and GLEPP1 antibodies were kindly provided by Roger C. Wiggins at the University of Michigan.

Investigator of the Howard Hughes Medical Institute and the Warren E. Grupe Professor. A.K. is supported by a HEFC Senior Clinical Lectureship. The research was also supported by the National

Institute for Health Research (NIHR) Biomedical Research Centre based at Guy's and St Thomas' NHS Foundation Trust and King's College London, Kids Kidney Research, Kidney Research UK, and

(D) Exon structure of human *CRB2* cDNA. Positions of start codon (ATG) at nt +1 and of stop codon (TGA) are indicated. For the mutations detected (see F), arrows indicate positions in relation to exons and protein domains (see E).

(E) Domain structure of the CRB2 protein. 15 EGF-like; calcium-binding domains (green) and 3 Laminin G-like domains (orange) are predicted.

(F) *CRB2* mutations detected in four families affected by SRNS. Family number and predicted translational change are indicated (see Table 1). Sequence traces are shown for homozygous mutations above normal controls, and mutated nucleotides are indicated by arrowheads. "HOM" denotes homozygous and "het" denotes heterozygous mutations.

(G) The conservation across evolution of altered amino acid residues is shown for all four missense variants (p.Cys620Ser, p.Arg628Cys, p.Cys629Ser, and p.Arg1249Gln).

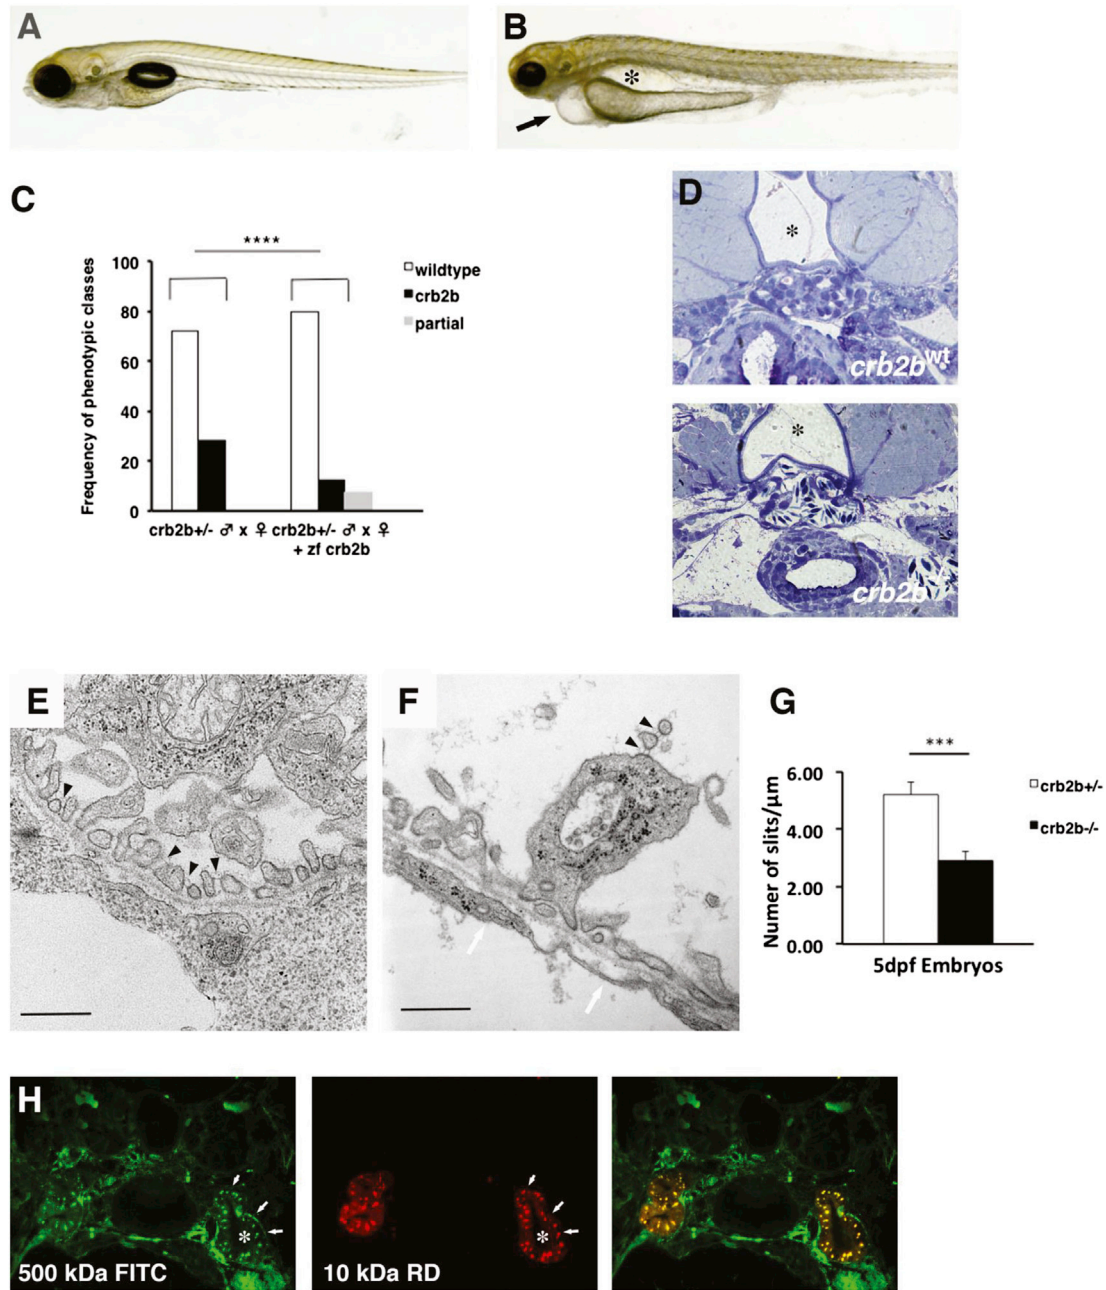

### Figure 3. Zebrafish *crb2b*<sup>-/-</sup> Mutants Have Morphologically Defective Podocytes

(A and B) Brightfield images of zebrafish 5 days postfertilization (dpf): *crb2b*<sup>wt</sup> (A) and *crb2b*<sup>-/-</sup> larvae (B). *crb2b*<sup>-/-</sup> homozygous mutants show reduced eye size, pericardial effusion (arrow), and pronephric cysts (asterisk).

(C) Rescue of the *crb2b*<sup>-/-</sup> eye, pronephric, and pericardial effusion phenotypes by injection of full-length zebrafish *Crab2b* mRNA. (*crb2b*<sup>+/-</sup> ♂ × ♀, n = 75; *crb2b*<sup>+/-</sup> ♂ × ♀ + zebrafish *Crab2b*, n = 183 embryos, p < 0.0001). Complete rescue (black bars) and partial rescue (gray bars) frequencies are shown. Phenotypes were scored at 4.5 dpf.

(D) Transverse sections at the level of the glomerulus in *crb2b*<sup>wt</sup> and *crb2b*<sup>-/-</sup> 5 dpf larvae. In controls, the glomerulus is directly ventral to the notochord (asterisk) and dorsal aorta. In *crb2b*<sup>wt</sup>, capillary loops are densely packed and covered with podocytes. In *crb2b*<sup>-/-</sup> glomeruli, capillary loops are fused together and podocytes are attached to the loops.

(E and F) Electron microscopic analysis of podocyte foot process organization in control *crb2b*<sup>wt</sup> (E) and *crb2b*<sup>-/-</sup> (F) homozygotes at 5 dpf. In *crb2b*<sup>wt</sup>, slit diaphragms are visible (black arrowheads in E). The *crb2b*<sup>-/-</sup> mutant podocytes show disorganized foot process formation, apical membrane projections containing slit diaphragms (black arrowheads in F) in the urinary space, and a rarefaction of slit diaphragms. A glomerular basement membrane is visible. The endothelium lacks membrane fenestrations in *crb2b*<sup>-/-</sup> mutants (white arrowheads in F). Scale bars represent 500 nm.

(G) Quantification of slit diaphragm defects in *crb2b*<sup>-/-</sup> mutants (p < 0.001, n = 3 regions/glomerulus from 3 different glomeruli). Data represent the mean ± SEM.

(H) Dye filtration assay shows that FITC-labeled 500 kDa (green) and rhodamine-labeled 10 kDa dextran (red) dyes injected into living 4.5 dpf *crb2b*<sup>-/-</sup> mutants are both passed into and endocytosed (arrows) by the pronephric proximal tubules. The asterisk marks the tubule lumen.



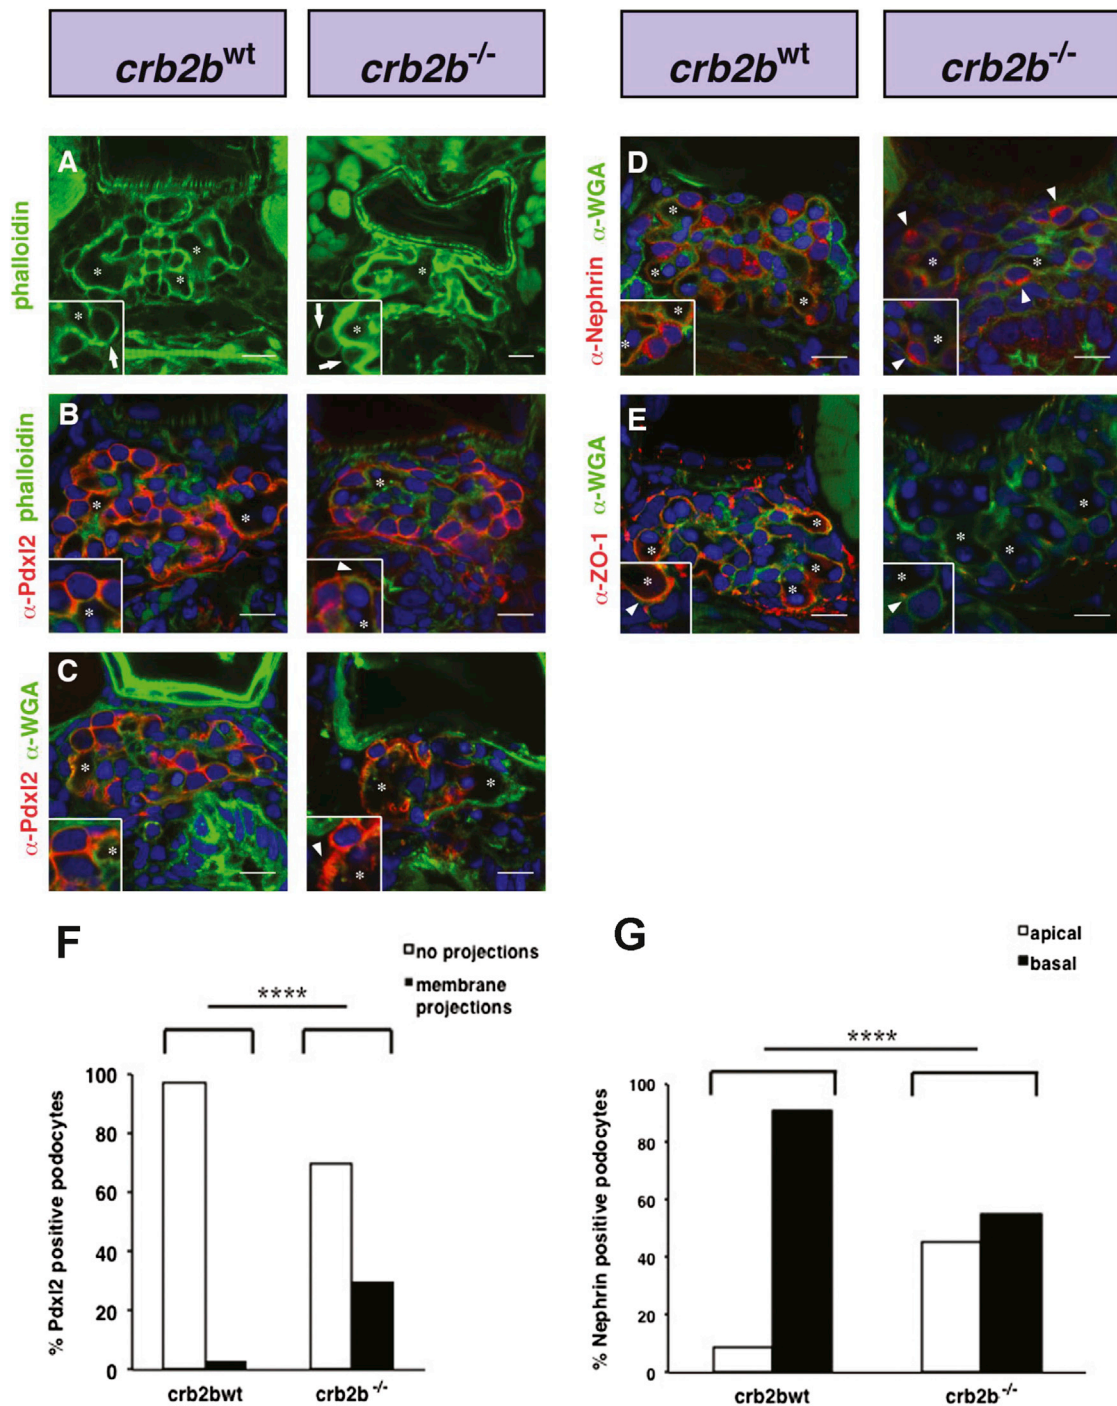

#### Figure 4. Apical Basal Polarity Is Affected in Zebrafish *crb2b*<sup>-/-</sup> Glomerular Podocytes

(A) Phalloidin staining outlines the dense podocyte actin foot process network surrounding capillary lumens. In *crb2b*<sup>-/-</sup> mutants, capillary lumens are not compartmentalized but fused into larger vessels. Insets show enlarged images of podocytes. Asterisks mark glomerular capillary lumens.

(B) In *crb2b*<sup>wt</sup>,  $\alpha$ -Pdx12 localizes to apical podocyte membranes. In *crb2b*<sup>-/-</sup> mutant podocytes,  $\alpha$ -Pdx12 staining is found in ectopic apical projections (arrowheads).

(C) Glomerular basement membranes are visualized by  $\alpha$ -wheat germ agglutinin ( $\alpha$ -WGA) staining. Asterisks mark glomerular capillary lumens. Pdx12 staining is again found in ectopic apical projections in *crb2b*<sup>-/-</sup> mutant podocytes (arrowheads).

(D)  $\alpha$ -WGA shows glomerular basement membranes.  $\alpha$ -Nephrin staining is basally localized in control podocytes but apically mislocalized in *crb2b*<sup>-/-</sup> podocytes (arrowheads).

(E)  $\alpha$ -ZO-1 (Zymed) podocyte staining lines the GBM in *crb2b*<sup>wt</sup> but is diminished in *crb2b*<sup>-/-</sup> mutants. Scale bars represent 10  $\mu$ m.

(F) Quantification of  $\alpha$ -Pdx12-positive membrane projections in *crb2b*<sup>wt</sup> and *crb2b*<sup>-/-</sup> podocytes. n = 37 (tallied from 6 embryos) *crb2b*<sup>wt</sup> control and n = 30 (tallied from 4 embryos) *crb2b*<sup>-/-</sup> podocytes.

(G) Quantification of  $\alpha$ -Nephrin localization in *crb2b*<sup>wt</sup> and *crb2b*<sup>-/-</sup> podocytes. n = 106 (tallied from 9 embryos) control and n = 67 (tallied from 5 embryos) *crb2b*<sup>-/-</sup> podocytes. p < 0.0001.

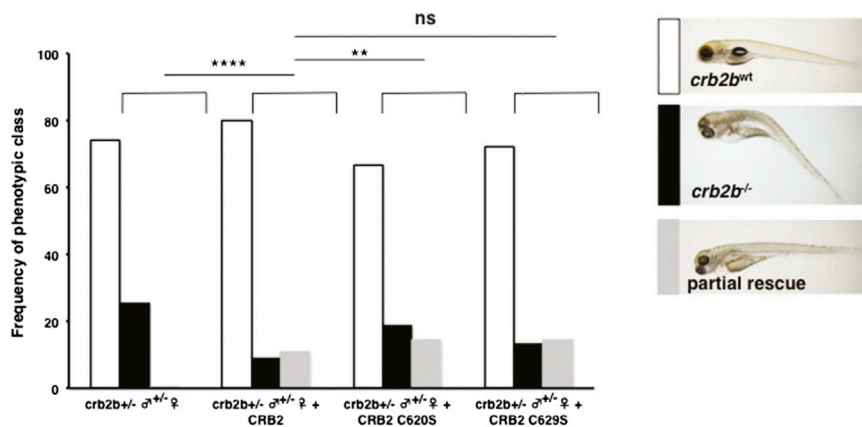

**Figure 5. Functional Assay of Human CRB2 Mutations in Zebrafish *crb2b*<sup>+/-</sup> ♂ × ♀ Crosses**

Phenotypic frequencies of *crb2b*<sup>wt</sup> and *crb2b*<sup>-/-</sup> mutant embryos after injection of human CRB2 control mRNA and the mRNAs harboring the mutations c.1859G>C; CRB2<sup>C620S</sup> and c.1882C>T; CRB2<sup>C629S</sup> (*crb2b*<sup>+/-</sup> ♂ × ♀, n = 363; *crb2b*<sup>+/-</sup> ♂ × ♀ + CRB2, n = 167, p = 0.02; *crb2b*<sup>+/-</sup> ♂ × ♀ + CRB2<sup>C620S</sup>, n = 117, p < 0.0001; *crb2b*<sup>+/-</sup> ♂ × ♀ + CRB2<sup>C629S</sup>, n = 283, p = 0.06; ns, no significant difference). Phenotypic classes of embryos recovered from rescue experiments. Partially rescued embryos have a straight body axis, phenotypically wild-type eyes, and lack pronephric cysts but still show some pericardial effusion. No rescue (black bars) and partial rescue (gray bars) frequencies are shown. Phenotypes were scored at 4.5 dpf.

the British Kidney Patients Association. We would like to acknowledge RADAR, the UK SRNS study group, especially Dr. Larissa Kerucuk for participation and support. The views expressed are those of the author(s) and not necessarily those of the NHS, the NIHR, or the Department of Health.

Received: July 31, 2014

Accepted: November 21, 2014

Published: December 31, 2014

## Web Resources

The URLs for data presented herein are as follows:

Ensembl Genome Browser, <http://www.ensembl.org/index.html>

HomozygosityMapper software, <http://www.homozygositymapper.org/>

NHLBI Exome Sequencing Project (ESP) Exome Variant Server, <http://evs.gs.washington.edu/EVS/>

Online Mendelian Inheritance in Man (OMIM), <http://www.omim.org/>

PolyPhen-2, <http://www.genetics.bwh.harvard.edu/pph2/>

Renal Genes, <http://www.renalgenes.org/>

RefSeq, <http://www.ncbi.nlm.nih.gov/RefSeq>

UCSC Genome Browser, <http://genome.ucsc.edu>

## References

- Reiser, J., Kriz, W., Kretzler, M., and Mundel, P. (2000). The glomerular slit diaphragm is a modified adherens junction. *J. Am. Soc. Nephrol.* *11*, 1–8.
- Wiggins, R.C. (2007). The spectrum of podocytopathies: a unifying view of glomerular diseases. *Kidney Int.* *71*, 1205–1214.
- Mekahli, D., Liutkus, A., Ranchin, B., Yu, A., Bessenay, L., Girardin, E., Van Damme-Lombaerts, R., Palcoux, J.B., Cachat, F., Lavocat, M.P., et al. (2009). Long-term outcome of idiopathic steroid-resistant nephrotic syndrome: a multicenter study. *Pediatr. Nephrol.* *24*, 1525–1532.
- ISKDC (1981). Primary nephrotic syndrome in children: clinical significance of histopathologic variants of minimal change and of diffuse mesangial hypercellularity. A Report of the International Study of Kidney Disease in Children. *Kidney Int.* *20*, 765–771.
- Benoit, G., Machuca, E., and Antignac, C. (2010). Hereditary nephrotic syndrome: a systematic approach for genetic testing and a review of associated podocyte gene mutations. *Pediatr. Nephrol.* *25*, 1621–1632.
- Lovric, S., Fang, H., Vega-Warner, V., Sadowski, C.E., Gee, H.Y., Halbritter, J., Ashraf, S., Saisawat, P., Soliman, N.A., Kari, J.A., et al.; Nephrotic Syndrome Study Group (2014). Rapid detection of monogenic causes of childhood-onset steroid-resistant nephrotic syndrome. *Clin. J. Am. Soc. Nephrol.* *9*, 1109–1116.
- Hildebrandt, F., Heeringa, S.F., Rüschenhoff, F., Attanasio, M., Nürnberg, G., Becker, C., Seelow, D., Huebner, N., Chernin, G., Vlangos, C.N., et al. (2009). A systematic approach to mapping recessive disease genes in individuals from outbred populations. *PLoS Genet.* *5*, e1000353.
- Halbritter, J., Diaz, K., Chaki, M., Porath, J.D., Tarrier, B., Fu, C., Innis, J.L., Allen, S.J., Lyons, R.H., Stefanidis, C.J., et al. (2012). High-throughput mutation analysis in patients with a nephronophthisis-associated ciliopathy applying multiplexed barcoded array-based PCR amplification and next-generation sequencing. *J. Med. Genet.* *49*, 756–767.
- Katoh, M., and Katoh, M. (2004). Identification and characterization of Crumbs homolog 2 gene at human chromosome 9q33.3. *Int. J. Oncol.* *24*, 743–749.
- den Hollander, A.I., Davis, J., van der Velde-Visser, S.D., Zonneveld, M.N., Pierrotet, C.O., Koenekoop, R.K., Kellner, U., van den Born, L.I., Heckenlively, J.R., Hoyng, C.B., et al. (2004). CRB1 mutation spectrum in inherited retinal dystrophies. *Hum. Mutat.* *24*, 355–369.
- Bujakowska, K., Audo, I., Mohand-Saïd, S., Lancelot, M.E., Antonio, A., Germain, A., Léveillard, T., Letexier, M., Saraiva, J.P., Lonjou, C., et al. (2012). CRB1 mutations in inherited retinal dystrophies. *Hum. Mutat.* *33*, 306–315.
- Ebarasi, L., He, L., Hultenby, K., Takemoto, M., Betsholtz, C., Tryggvason, K., and Majumdar, A. (2009). A reverse genetic screen in the zebrafish identifies *crb2b* as a regulator of the glomerular filtration barrier. *Dev. Biol.* *334*, 1–9.
- Amsterdam, A., and Hopkins, N. (2006). Mutagenesis strategies in zebrafish for identifying genes involved in development and disease. *Trends Genet.* *22*, 473–478.
- Jao, L.E., Maddison, L., Chen, W., and Burgess, S.M. (2008). Using retroviruses as a mutagenesis tool to explore the zebrafish genome. *Brief. Funct. Genomics Proteomics* *7*, 427–443.



15. Alves, C.H., Sanz, A.S., Park, B., Pellissier, L.P., Tanimoto, N., Beck, S.C., Huber, G., Murtaza, M., Richard, F., Sridevi Gurusaran, I., et al. (2013). Loss of CRB2 in the mouse retina mimics human retinitis pigmentosa due to mutations in the CRB1 gene. *Hum. Mol. Genet.* *22*, 35–50.
16. Zou, J., Wang, X., and Wei, X. (2012). Crb apical polarity proteins maintain zebrafish retinal cone mosaics via intercellular binding of their extracellular domains. *Dev. Cell* *22*, 1261–1274.
17. Kerjaschki, D., Sharkey, D.J., and Farquhar, M.G. (1984). Identification and characterization of podocalyxin—the major sialoprotein of the renal glomerular epithelial cell. *J. Cell Biol.* *98*, 1591–1596.
18. Herwig, L., Blum, Y., Krudewig, A., Ellertsdottir, E., Lenard, A., Belting, H.G., and Affolter, M. (2011). Distinct cellular mechanisms of blood vessel fusion in the zebrafish embryo. *Curr. Biol.* *21*, 1942–1948.
19. Babayeva, S., Rocque, B., Aoudjit, L., Zilber, Y., Li, J., Baldwin, C., Kawachi, H., Takano, T., and Torban, E. (2013). Planar cell polarity pathway regulates nephrin endocytosis in developing podocytes. *J. Biol. Chem.* *288*, 24035–24048.
20. Hartleben, B., Schweizer, H., Lübber, P., Bartram, M.P., Möller, C.C., Herr, R., Wei, C., Neumann-Haefelin, E., Schermer, B., Zentgraf, H., et al. (2008). Neph-Nephrin proteins bind the Par3-Par6-atypical protein kinase C (aPKC) complex to regulate podocyte cell polarity. *J. Biol. Chem.* *283*, 23033–23038.
21. Satoh, D., Hirose, T., Harita, Y., Daimon, C., Harada, T., Kurihara, H., Yamashita, A., and Ohno, S. (2014). aPKC $\lambda$  maintains the integrity of the glomerular slit diaphragm through trafficking of nephrin to the cell surface. *J. Biochem.* *156*, 115–128.
22. Schnabel, E., Anderson, J.M., and Farquhar, M.G. (1990). The tight junction protein ZO-1 is concentrated along slit diaphragms of the glomerular epithelium. *J. Cell Biol.* *111*, 1255–1263.
23. Fukasawa, H., Bornheimer, S., Kudlicka, K., and Farquhar, M.G. (2009). Slit diaphragms contain tight junction proteins. *J. Am. Soc. Nephrol.* *20*, 1491–1503.

The American Journal of Human Genetics

Supplemental Data

## **Defects of *CRB2* Cause**

## **Steroid-Resistant Nephrotic Syndrome**

Lwaki Ebarasi, Shazia Ashraf, Agnieszka Bierzynska, Heon Yung Gee, Hugh J. McCarthy, Svjetlana Lovric, Carolin E. Sadowski, Werner Pabst, Virginia Vega-Warner, Humphrey Fang, Ania Koziell, Michael A. Simpson, Ismail Dursun, Ervin Serdaroglu, Shawn Levy, Moin A. Saleem, Friedhelm Hildebrandt, and Arindam Majumdar

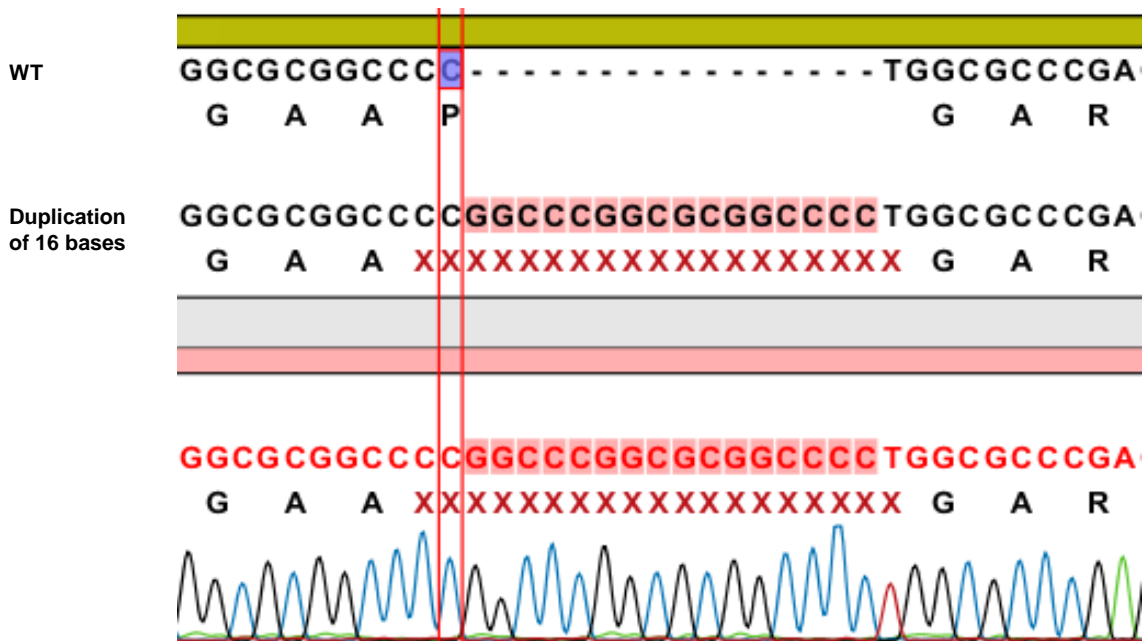

**Figure S1.** Amplification and cloning using the genomic DNA of the affected individual from family S1232 showed duplication of sixteen bases in exon 10 of CRB2.



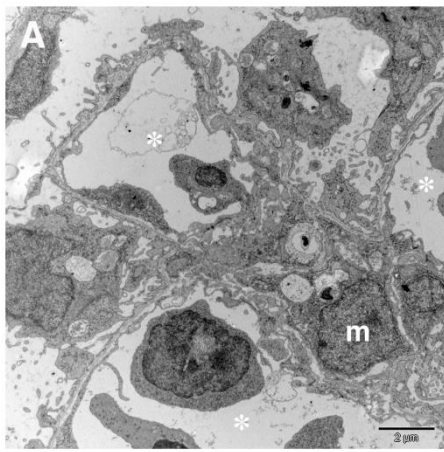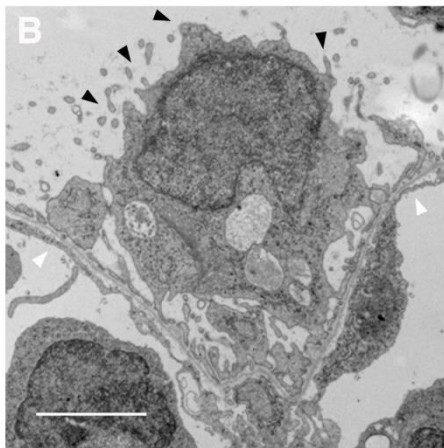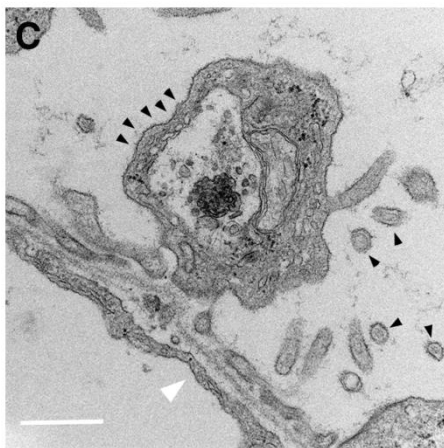

**Figure S2. Electron microscopic analysis of *crb2b*<sup>-/-</sup> glomeruli and podocytes.**

- (A)** Capillary loops in *crb2b*<sup>-/-</sup> glomeruli are disorganized. Capillary endothelia lack fenestrations (capillary lumens are marked with asterisks). Mesangial cells (m) can be identified closely associated with endothelia and surrounded by GBM. Scale bar, 2 μm.
- (B)** Representative *crb2b*<sup>-/-</sup> podocyte shows apical membrane projections (black arrowheads) and disorganized foot process structure. Note the absence of endothelial fenestrations (white arrowhead). Scale bar, 2 μm.
- (C)** Detail of *crb2b*<sup>-/-</sup> podocyte process. The disorganized process contains vesicular structures (black arrowheads) and apical membrane extensions. The GBM is visible and endothelial membranes lack fenestrations (white arrowhead). Scale bar, 500 nm.

**Table S1. Filtering process for variants from normal reference sequence (VRS) following WES in one sibling from family A1968 affected with SRNS.**

| FAMILY                                                                     | A1968                  |
|----------------------------------------------------------------------------|------------------------|
| <sup>a</sup> AFFECTED SIBLING SENT FOR WES                                 | A1968-21               |
| Consanguinity                                                              | Yes                    |
| <sup>b</sup> # of homozygosity peaks                                       | 5                      |
| Cumulative Homozygosity by descent <sup>c</sup> [Mb]                       | 106                    |
| <sup>c</sup> Hypothesis from mapping: homozygous (Hom), heterozygous (het) | Hom                    |
| Total sequence reads (Mill.)                                               | 212                    |
| Matched Reads                                                              | 98.2%                  |
| Total DIPs                                                                 | 79,344                 |
| Exonic DIPs                                                                | 325                    |
| % exonic / total DIPs                                                      | 0.40%                  |
| DIPS not SNP137                                                            | 152                    |
| DIPS in linked region                                                      | 24                     |
| DIPS after after inspection and not SNP138 (>1% MAF)                       | 0                      |
| Sanger confirmation / Segregation                                          | -                      |
| Total SNPs                                                                 | 319,298                |
| Exonic SNPs                                                                | 5,529                  |
| % exonic / total SNPs                                                      | 1.70%                  |
| SNPs not SNP137                                                            | 466                    |
| SNPs in linked region                                                      | 132                    |
| SNPs after after inspection and not SNP138 (>1% MAF)                       | 15                     |
| <sup>d</sup> Sanger confirmation / Segregation                             | 1                      |
| Causative gene                                                             | <b>CRB2</b>            |
| Mutation effect on gene product                                            | <b>Cys620Ser (Hom)</b> |

<sup>a</sup>see Table 1

<sup>b</sup>see Fig. 1

<sup>c</sup>evaluation for homozygous variants was done in regions of homozygosity by descent for 2 affected sibs.

<sup>d</sup>red numbers denote number of filtered-down variant(s) that contained the disease causing gene.

"-" , not applicable; DIP, deletion/insertion polymorphism; SNPs, single nucleotide polymorphism; SRNS, Steroid Resistant Nephrotic Syndrome.
